# Supplementary material for: Body mass index and type 2 diabetes in Thai adults: defining risk thresholds and population impacts
Source: Springer Nature journal article supplement (doi:10.1186/s12889-017-4708-7), 2017-09-15
Supplement: MOESM1 [file 15063334]

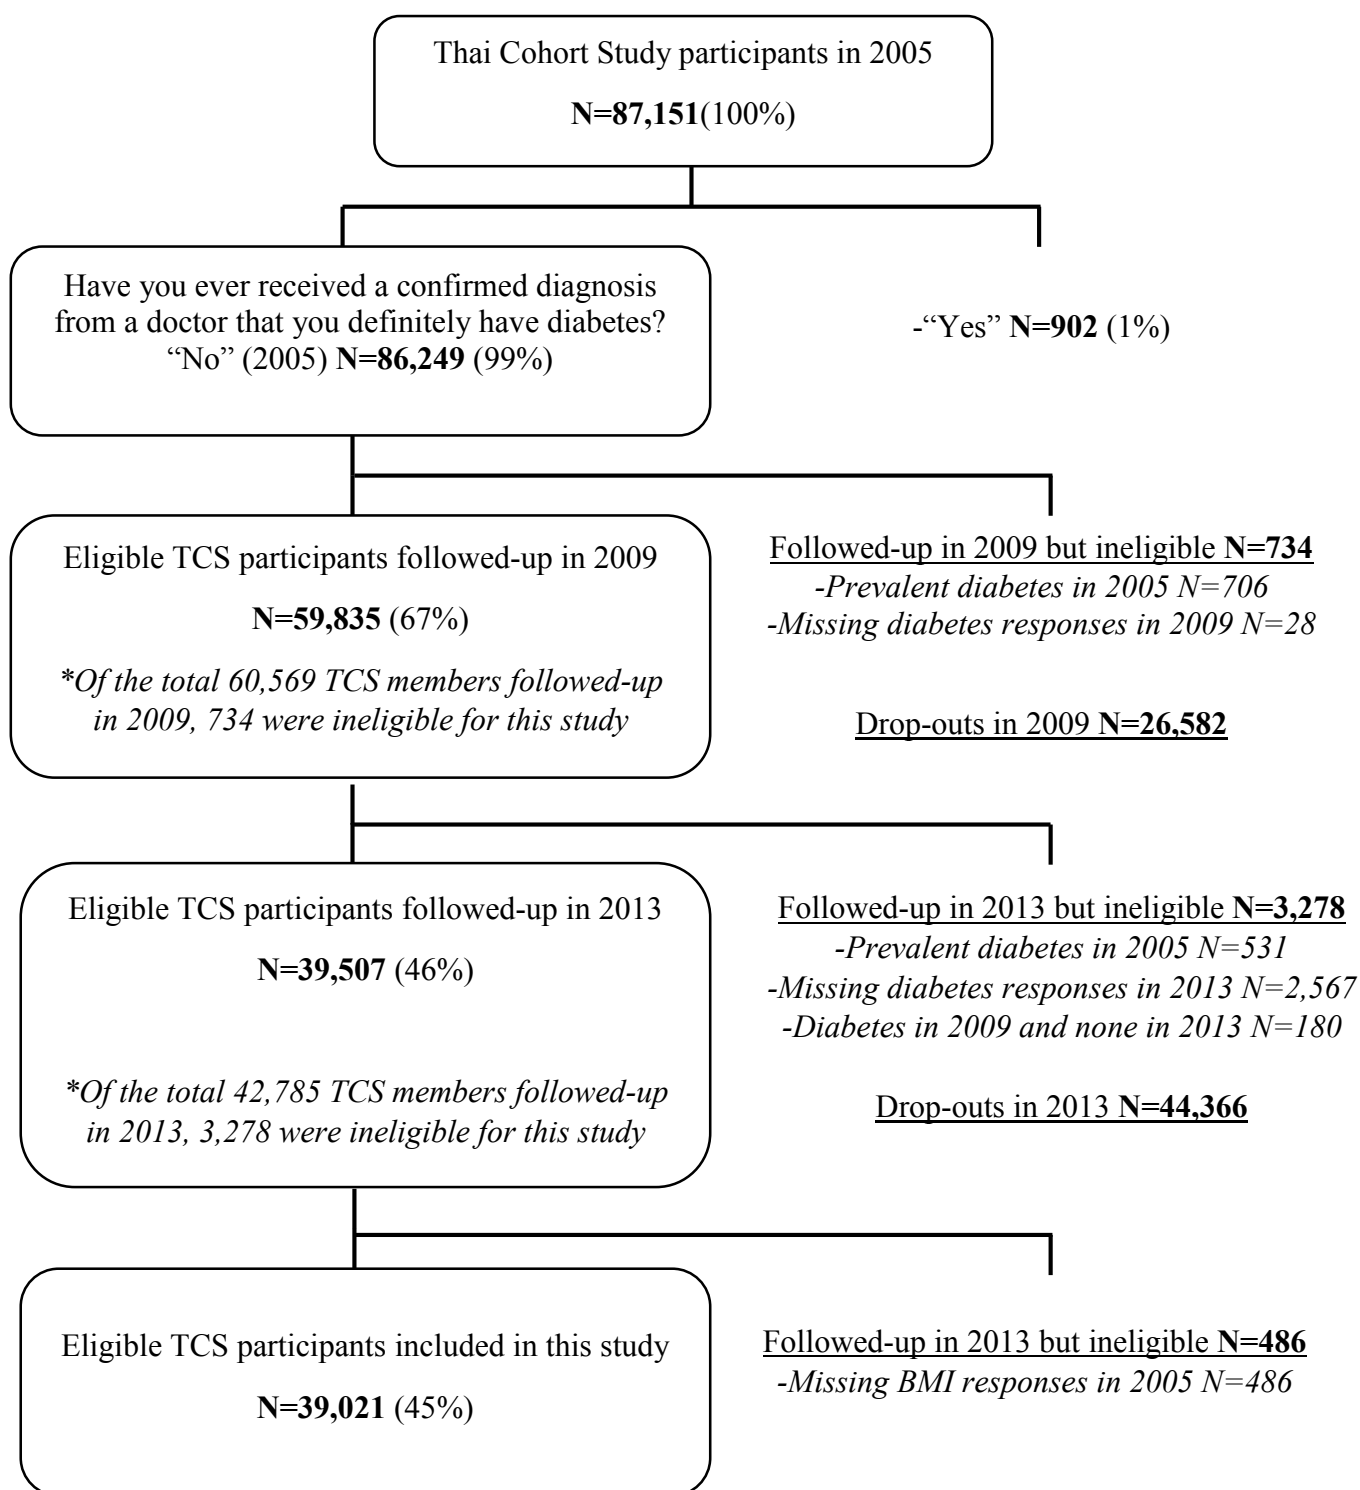

**Additional file 1**

**Figure: Selection of the analysed cohort from the Thai Cohort Study**
